# Supplementary material for: Possible role of hydrolytic enzymes (Sap, Kex2) in Candida albicans response to aromatic compounds bearing a sulfone moiety
Source: publisher site journal article supplement (doi:10.1515/chempap-2016-0072), 2016-01-01
Supplement: Supplementary file 1 [file chempap-2016-0072_supplement.docx]

**SUPPLEMENTARY DATA**

**Possible role of hydrolytic enzymes (Sap, Kex2) in *Candida albicans* response to aromatic compounds bearing a sulfone moiety**

**aMałgorzata Bondaryk, bIlona Grabowska-Jadach,bZbigniew Ochal, cGrażyna Sygitowicz, aMonika Staniszewska[[1]](#footnote-1)***

a*National Institute of Public Health-National Institute of Hygiene, Chocimska 24, 00-791 Warsaw, Poland*

b*Faculty of Chemistry, Warsaw University of Technology, Noakowskiego 3, 00-664 Warsaw, Poland*

c*Department of Laboratory Medical Diagnostics, Medical University of Warsaw, Banacha 1, 02-097 Poland*

Received 9 October 2015; Revised 22 February 2016; Accepted 25 February 2016

**1. General methods**

All reactions were set up in the air and using undistilled solvents, unless stated otherwise. The reagents were purchased from commercial sources and were used without further purification. The reported yields refer to pure isolated products, unless stated otherwise. Reactions were monitored by gas chromatography (GC) and/or thin layer chromatography (TLC) carried out on silica gel plates, using UV light. employed glass 0.25 mm silica gel plates. Flash chromatographycolumns were packed with 200-300 mesh silica gel in hexane.1H NMR spectra were recorded on a Varian Mercury 400 MHz spectrometer in CDCl3, using TMS (tetramethylsilane) as an internal standard; all signals are reported in ppm as (s = singlet, d = doublet, dd = doublet of doublets, m = multiplet, integration. ). IR spectra were recorded in paraffin oil on a Specord M80 Zeiss Jena spectrophotometer and reported with interpretation of significant bands. Elemental analyses were obtained by means of a Perkin Elmer 2400 apparatus. All melting points (m.p.) are given uncorrected.

**2. Experimental procedures**

The synthesis of 2-bromo-2-chloro-2-(4-chlorophenylsulfonyl)-1-phenylethanone (Compound 1) consists of three steps, according to the scheme:

Scheme 1. Synthesis of 2-bromo-2-chloro-2-(4-chlorophenylsulfonyl)-1-phenylethanone (Compound 1)

**Synthesis of 2-(4-chlorophenyl)sulfonyl-1-phenylethanone (c) (**Suryakiran et al., 2006**)**

A mixture of the sodium 4-chlorophenyl sulphinate (a) (1.1 mmol) and -bromo-4-chloroacetophenone (b) (1 mmol) was taken in 10 mL of polyethylene glycol ( PEG 400) and stirred at rt for 1 h. After completion of the reaction, as monitorem by TLC, the reaction mass was poured into water (50 mL) and extracted into ethyl acetale ( 3 . 15 mL)and dryed over anhydrous magnesium sulfate. The organic layer was removed under reduced pressure, and the crude product was crystallized from metanol. (Yield 85%, m.p. 133 - 134oC ). Elemental analysis: for C14H11ClO3S (294.75) - Calcd.: 57.05%C, 3.76 %H. Found: 57.08 %C, 3.80 %H. 1H NMR (400 MHz, CDCl3) δ: 4.78 (s, 2H), 7.46-7.52 (m, 4H), 7.68 (t, *J*= 7.4 Hz,1H), 7.85 (d, *J*= 8.8 Hz, 2H), 7.96 (d, *J*= 8.5 Hz, 2H).

**Synthesis of 2-chloro-2-(4-chlorophenyl)sulfonyl-1-phenylethanone (b) (**Suryakiran et al., 2007**)**

To a solution of 2-(4-chlorophenyl)sulfonyl-1-phenylethanone (c) (10 mmol) in acetic acid

(10 mL) was added KCl (11 mmol) and 30% of hydrogen peroxide (80 mmol). The reaction was stirred at room temperature for 5 hours. After completion of the reaction, as monitored by

TLC, the acetic acid was removed under reduced pressure, water (20 mL) was added and the product extracted into ethyl acetate (3 · 20 mL). The combined organic extracts were dried over anhydrous magnesium sulfate and evaporated under reduced pressure to give the

crude product, which was purified on a silica gel kolumn using hexane:ethyl acetate (9:1) as eluent. ( Yield 78%, m.p. 146 – 147oC). Elemental analysis: for C14H10Cl2O3S (329.20) - Calcd.: 51.08%C, 3.06 %H. Found: 51.05%C, 3.09 %H. 1H NMR (400 MHz, CDCl3) δ: 6.46 (s, 1H), 7.48-7.54 (m, 4H), 7.67-7.71 (m,1H), 7.84-7.97 (m, 4H).

**Synthesis of 2-bromo-2-chloro-2-(4-chlorophenyl)sulfonyl-1-phenylethanone (1)**

To a solution of2-chloro-2-(4-chlorophenyl)sulfonyl-1-phenylethanone (1 mmol) in dichloromethane (10 mL) were added Et3N (1 mmol) and bromine ( 1.15 mmol). The reaction mixture was stirred at room temperature for 3h. After completion of the reaction, as monitored by TLC, the solvent was removed under reduced pressure, water (15 mL) was added and the product extracted into ethyl acetate (3 · 20 mL). The combined organic

extracts were dried over anhydrous magnesium sulfate and evaporated under reduced pressure to give the crude product, which was purified on a silica gel column using heptane : ethyl acetate (8:2) as eluent. ( Yield 84%, m.p. 168 – 169oC). Elemental analysis: for C14H9BrCl2O3S (408.09) - Calcd.: 41.20%C, 2.22 %H. Found: 41.23%C, 2.25 %H. 1H NMR (400 MHz, CDCl3) δ: 7.52-7.56 (m, 4H), 7.68-7.74 (m,1H), 7.85-7.98 (m, 4H).

**Synthesis of 4-chloro-3-nitrophenyldichloromethyl sulfone (Compound 2)**

The synthesis of 1-chloro-4-dichloromethylsulfonyl-2-nitrobenzeneconsists of two steps according to the scheme:

Scheme 2. Synthesis of 4-chloro-3-nitrophenyldichloromethyl sulfone

**Synthesis of 4-chlorophenyldichloromethylsulfone (f)** (Staniszewska et al., 2015)

To the suspension of natrium 4-chlorobenzenesulfinate (2.0 g, 20 mmol) in chloroform ( 10 mL), potassium hydroxide (1.12 g, 20 mmol) in water (7.0 mL) was added. The reaction mixture was intensively stirred and refluxed for 4 hours. The completion of the reaction was monitored by GC. After cooling, the organic layer was separated and water phase was extracted with chloroform (3 . 5 mL). The combined organic phase was washed with water and dried over anhydrous MgSO4, filtered and the solvent was removed in a rotary evaporator. The residue was crystallised from ethanol. 4-Chlorophenyl-dichloromethyl sulfone (f) was obtained as white crystallic substance (2.12 g, 82% yield). M.p = 121°C. IR (cm–1): 1585 (CHar), 1342, 1145 (SO2). 1H-NMR, 400MHz, (CDCl3) δ: 6.49 (s, 1H); 7.61 – 7.64 (m, 2H); 7.93 – 7.95 (m, 2H). 13C NMR (100 MHz, CDCl3) δ: 87.26; 126.45; 130.13; 132.68; 143.46.

**Synthesis of 4-chloro-3-nitrophenyldichloromethyl sulfone (2)**

Sulfone (f)(5.19 g, 20 mmol) was dissolved in concentrated (min. 95% w/w) sulfuric acid (25 mL). The mixture was heated to 60°C and concentrated (fuming, min. 90% w/w) nitric acid (1.7 mL, 25 mmol HNO3) was added slowly keeping the temperature of the reaction mixture below 70°C. When the addition was finished, the mixture was heated at 80°C for 2 hours. Then the mixture was cooled down and poured onto crushed ice. The precipitate was filtered off, washed with water and dried. The product was purified by recrystallization from ethanol. Nitrophenyl sulfone 2was obtained in 94% of yield (5.72 g), m.p. = 90–91°C. IR (cm–1): 1595 (CHar), 1535, 1367 (NO2), 1334, 1145 (SO2). 1H-NMR, 400MHz, (CDCl3) δ: 6.33 (s, 1H); 7.85 – 7.98 (m, 1H); 8.15 (d, 1H, *J* = 2.4 Hz); 8.52 (d, 1H, *J* = 2.4 Hz). 13C NMR (100 MHz, CDCl3) δ: 79.55; 128.42; 132.61; 133.18; 134.97; 135.25; 142.78. Elemental analysis: for C7H4Cl3NO4S (304.53) Calcd.: 27.61 % C, 1.32 % H, 4.60 % N. Found: 27.58 % C, 1.29 % H, 4.56 % N.

**Expression level of the *ACT1* reference gene**

We examined raw Ct values from *ACT1* in the complete data set (Table S1). *ACT1*exhibited dispersion of Ct values in the different strains (prepared as described in Experimental)under our growth conditions.

Table S1. Expression levels (Ct) of *ACT1*

| *C. albicans*/ growth medium | | Not treated cells | Treated cells |
| --- | --- | --- | --- |
| SC5314 | YEPD | 25.92±1.11 | 38.50±2.00 |
| *∆sap4* | 21.52±6.47 | 32.27±4.21 |
| *∆sap5* | 25.30±6.57 | 36.26±4.98 |
| *∆sap456* | 24.71±7.50 | 29.77±5.64 |
| *∆sap6* | 29.85±1.54 | 33.39±3.29 |
| SC5314 | Caco2 | 27.78±2.19 | 34.83±3.02 |
| *∆sap4* | 34.75±1.53 | 38.77±3.32 |
| *∆sap5* | 28.82±1.38 | 34.79±5.75 |
| *∆sap456* | 28.86±2.43 | 29.77±5.00 |
| *∆sap6* | 29.22±4.69 | 38.44±2.12 |

**References**

Staniszewska, M., Bondaryk, M. & Ochal, Z. (2015). New synthetic sulfone derivatives inhibit growth, adhesion and the leucine arylamidase *APE2* gene expression of *Candida albicans in vitro. Bioorganic & Medicinal Chemistry, 23,* 314-321. DOI: 10.1016/j.bmc.2014.11.038.

Suryakiran, N., Srikanth Reddy, T., Ashalatha, K. Lakshman, M., & Venkateswarlu, Y. (2006). Facile polyethylene glycol (PEG-400) promoted synthesis of -ketosulfones. *Tetrahedron Letters, 47,* 3853–3856. DOI: 10.1016/j.tetlet.2006.03.181.

Suryakiran, N., Prabhakar, P., Srikanth Reddy, T., Chinni Mahesh, K., Rajesh, K.,& Venkateswarlu, Y. (2007). Chemoselective mono halogenation of -keto-sulfones usingpotassium halide and hydrogen peroxide; synthesis of halomethyl sulfones and dihalomethyl sulfones. *Tetrahedron Letters*, *48,* 877–881. DOI: 10.1016/j.tetlet.2006.11.129.

1. *Corresponding author, e-mail:mstaniszewska@pzh.gov.pl [↑](#footnote-ref-1)
